# Supplementary material for: CoFe alloy nanoparticles encapsulated in a 3D honeycomb-like N-doped graphitic carbon framework for photocatalytic CO2reduction
Source: Royal Society of Chemistry journal article supplement (doi:10.1039/d2ta06088d), 2022-01-01
Supplement: d2ta06088d1.pdf [file d2ta06088d1.pdf]

## Supplementary material

CoFe alloy nanoparticles encapsulated in 3D honeycomb-like N-doped graphitic carbon framework for photocatalytic CO<sub>2</sub> reduction

Lang He<sup>a</sup>, Wenyuan Zhang<sup>b</sup>, Fei Lv<sup>a</sup>, Xirui Kong<sup>a</sup>, Yayun Zheng<sup>a</sup>, Yi Song<sup>a\*</sup>, Yan Zhao<sup>a,c\*</sup>

<sup>a</sup> *The Institute of Technological Sciences, Wuhan University, Wuhan, 430072, P. R. China.*

<sup>b</sup> *School of Chemistry and Chemical Engineering, Harbin Institute of Technology, Harbin, 150080, P. R. China*

<sup>c</sup> *State Key Laboratory of Silicate Materials for Architectures, International School of Materials Science and Engineering, Wuhan University of Technology, Hubei, Wuhan 430070, People's Republic of China*

*\* Corresponding author*

E-mail: [yi.song@whu.edu.cn](mailto:yi.song@whu.edu.cn) (Yi Song); [yan2000@whut.edu.cn](mailto:yan2000@whut.edu.cn) (Y. Zhao)

### Time-resolved transient PL measurement

Fluorescence lifetime and steady-state spectrometer (FLs980, Edinburgh Instruments, UK) was used to test the steady-state lifetime photoluminescence (PL) spectrum and time-resolved photoluminescence (TRPL) spectrum, and the excitation wavelength was 384 nm. The emission decay data were fitted to a double-exponential model and the emission decay behavior is deduced through Eq. (1)

$$\tau_{avg.} = \frac{A_1\tau_1^2 + A_2\tau_2^2}{A_1\tau_1 + A_2\tau_2} \quad (1)$$

Where  $\tau$  and  $A$  are the decay time and the relative magnitude of components, respectively, and  $\tau_{avg}$  is the intensity-averaged lifetime used for an overall comparison. The fitting results show the fast decay component ( $\tau_1$  and  $A_1$ ) and the minority-slow component ( $\tau_2$  and  $A_2$ ), decaying from the free excited states and the bound excited states, respectively.

### **Photoelectrochemistry measurement**

The electrochemical measurements were performed on an electrochemical workstation (CHI760C, Chinstruments, China) using a three-electrode system. A Pt foil was used as counter electrode, the Ag/AgCl electrode was used as reference electrode, and the FTO conductive glass (1×1cm), whose conductive side was coated with thin sample film, was used as the working electrode. 0.5 M Na<sub>2</sub>SO<sub>4</sub> solution was used as electrolyte.

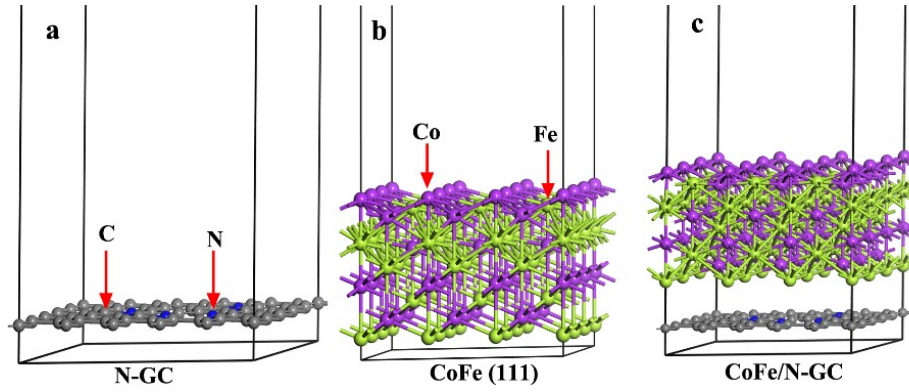

**Fig. S1** Models for (a) N-GC, (b) CoFe (111) lattice plane and (c) Optimized CoFe/N-GC structure model.

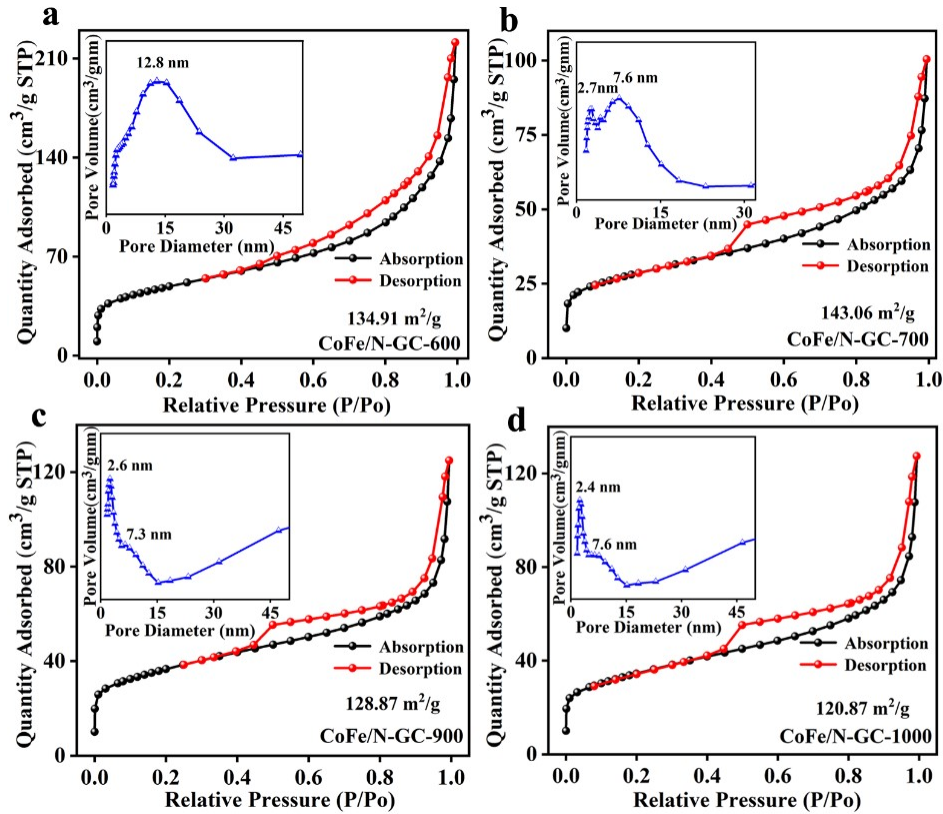

**Fig. S2** (a-d) The  $N_2$  adsorption desorption isotherms and pore size distribution (inset) of CoFe/N-GC-600, CoFe/N-GC-700 and CoFe/N-GC-900 and CoFe/N-GC-1000 respectively.

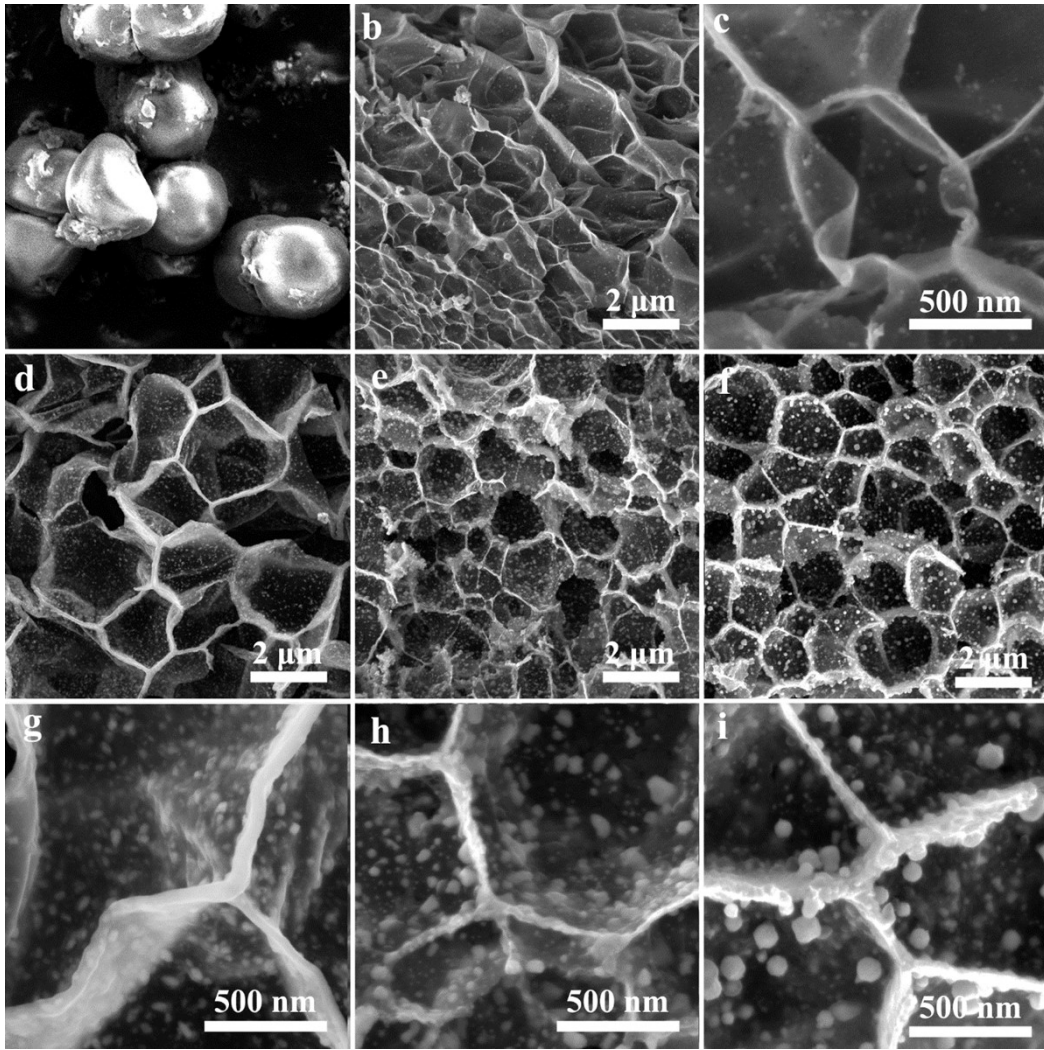

**Fig. S3** The SEM images of  $\text{Co}^{2+}$ ,  $\text{Fe}^{3+}$ -PVP precursor, CoFe/N-GC-600 (b, c), CoFe/N-GC-700 (d, g), CoFe/N-GC-900 (e, h) and CoFe/N-GC-1000 (f, i).

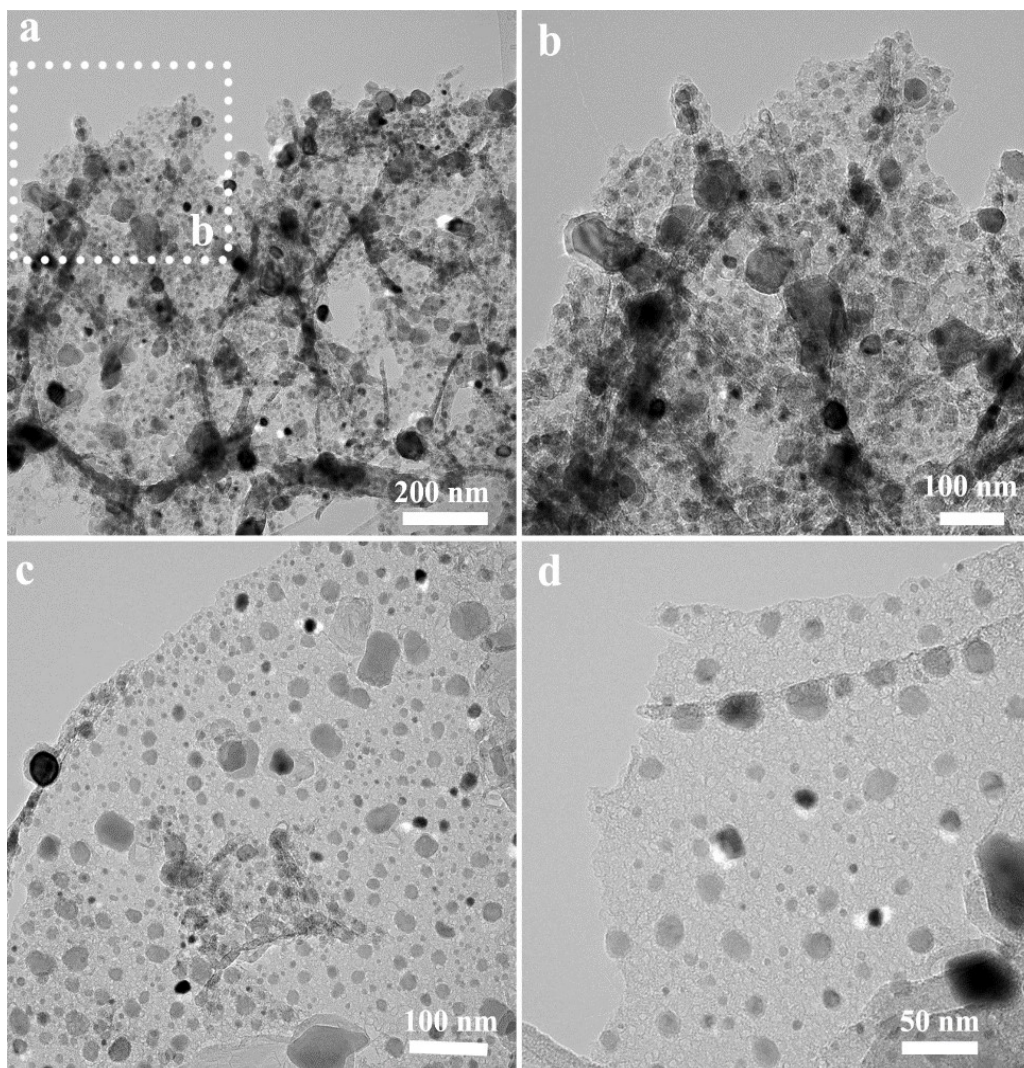

**Fig. S4** (a-d) Low magnification TEM image of CoFe/N-GC-800



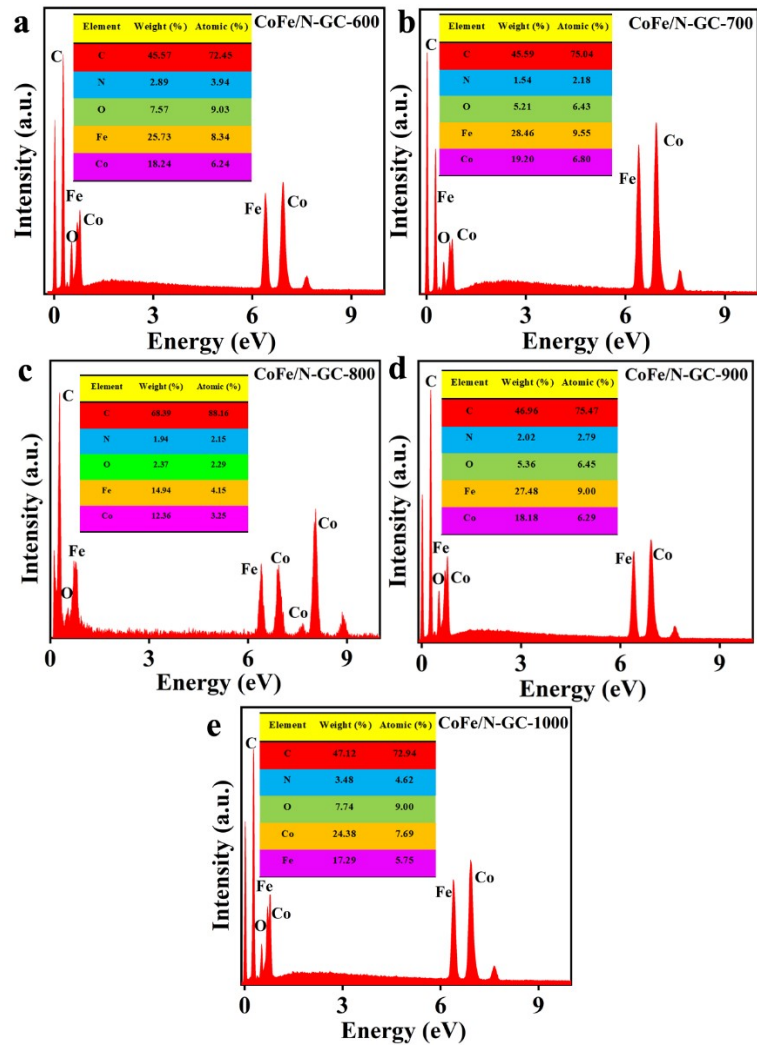

**Fig. S5** EDS spectrum of CoFe/N-GC-600, CoFe/N-GC-700, CoFe/N-GC-800, CoFe/N-GC-900 and CoFe/N-GC-1000.

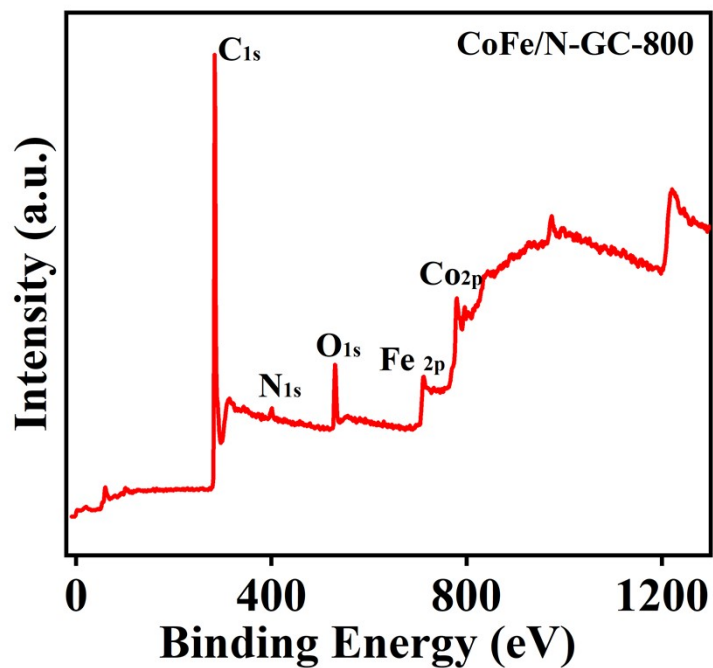

Fig. S6 The XPS survey spectra of CoFe/N-GC-800.

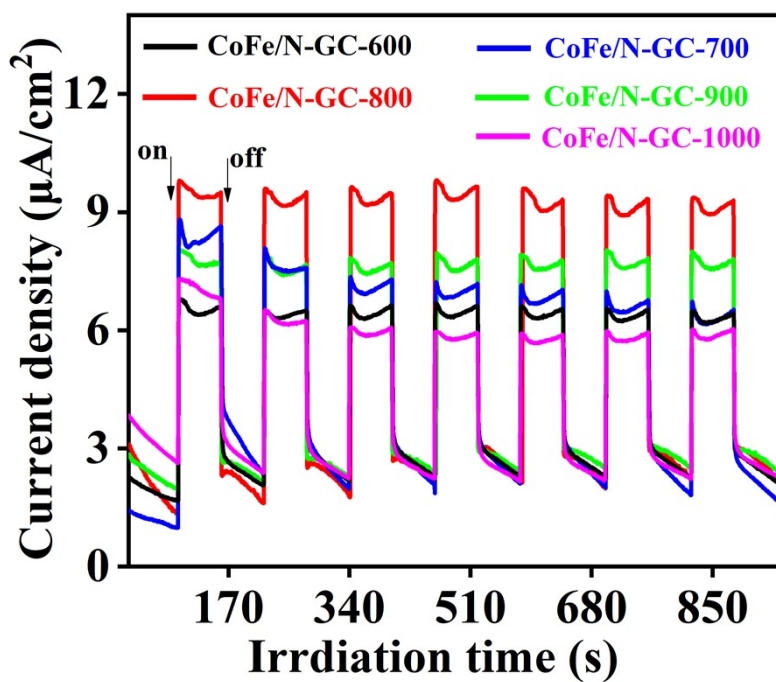

Fig. S7 Transient photocurrent responses of the obtained photocatalysts under 300 W simulated solar Xe arc lamp in 0.5 M  $\text{Na}_2\text{SO}_4$  aqueous solution.

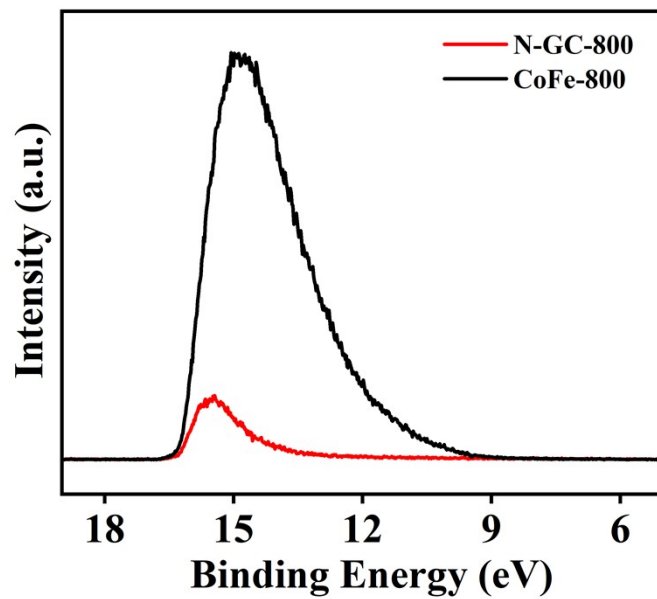

**Fig. S8** UPS of N-GC-800 and CoFe-800 composite.

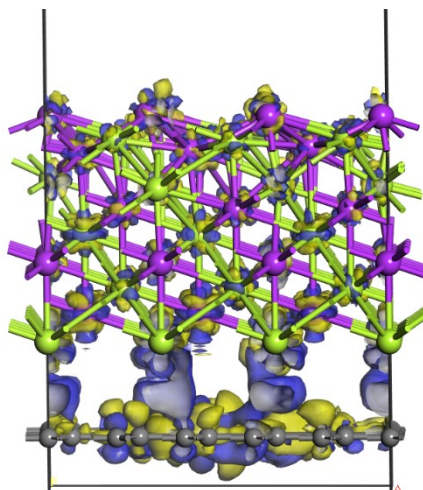

**Fig. S9** The differential charge density of the N-GC and CoFe (111).



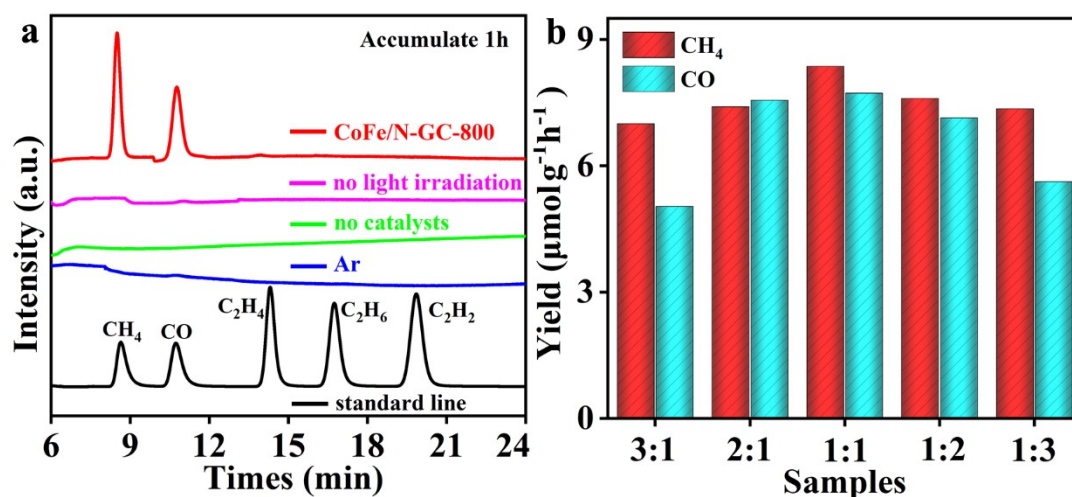

**Fig. S10** (a) Comparison of gas chromatograms of the photocatalytic  $\text{CO}_2\text{RR}$  of gaseous products on the CoFe/N-GC-800 catalyst under different conditions under 1 h light irradiation. (b) Photocatalytic activity of photocatalysts with different mass ratios calcinated at  $800\text{ }^\circ\text{C}$ . ( $\text{Co}(\text{NO}_3)_2 \cdot 6\text{H}_2\text{O} : \text{Fe}(\text{NO}_3)_2 \cdot 9\text{H}_2\text{O} = 3:1, 2:1, 1:1, 1:2$  and  $1:3$ )

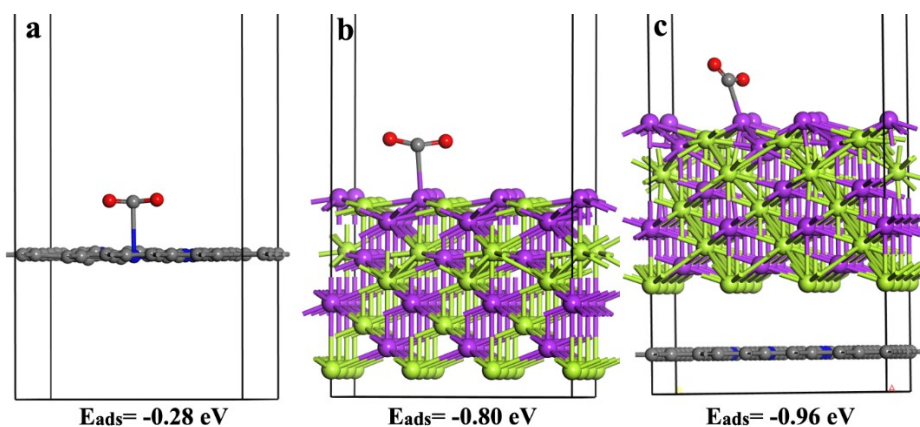

**Fig. S11** Simulated  $\text{CO}_2$  adsorption on the optimized structural (a) N-GC, (b) CoFe (111) lattice plane and (c) CoFe/N-GC.

**Table S1** Fitting parameters for TRPL curves recorded for CoFe/N-GC samples.

| Sample                | $\tau_1$ (ns) | % percentage | $\tau_2$ (ns) | % percentage | $\tau_{\text{avg}}$ (ns) |
|-----------------------|---------------|--------------|---------------|--------------|--------------------------|
| <b>CoFe/N-GC-600</b>  | 0.42          | 0.63         | 0.42          | 0.37         | 0.42                     |
| <b>CoFe/N-GC-700</b>  | 0.43          | 0.63         | 0.43          | 0.37         | 0.43                     |
| <b>CoFe/N-GC-800</b>  | 0.32          | 0.68         | 0.34          | 0.32         | 0.32                     |
| <b>CoFe/N-GC-900</b>  | 0.46          | 0.63         | 0.46          | 0.37         | 0.46                     |
| <b>CoFe/N-GC-1000</b> | 0.41          | 0.65         | 0.41          | 0.35         | 0.41                     |
